# Supplementary material for: Electrochemiluminescence immunosensor using poly(l-histidine)-protected glucose dehydrogenase on Pt/Au bimetallic nanoparticles to generate an in situ co-reactant
Source: Royal Society of Chemistry journal article supplement (doi:10.1039/c4an00452c), 2014-01-01
Supplement: c4an00452c1.pdf [file c4an00452c1.pdf]

*Electronic Supplementary Information*

**Electrochemiluminescence immunosensor using poly(L-histidine) protected glucose dehydrogenase on Pt/Au bimetallic nanoparticles to in situ generate co-reactant**

Lijuan Xiao, Yaqin Chai\*, Haijun Wang and Ruo Yuan

*Education Ministry Key Laboratory on Luminescence and Real-Time Analytical Chemistry, College of Chemistry and Chemical Engineering, Chongqing 400715, People's Republic of China*

***The preparation of 0.25 wt % chitosan solution***

0.25 wt % chitosan solutions were prepared by dissolving 25 mg chitosan in 10 mL 1% acetic acid solution with magnetic stirring for ~2 h.

***The preparation of AuNPs***

AuNPs were synthesized according to the previous report with a little modification<sup>1</sup>. Briefly, 1.0 mL of 1% HAuCl<sub>4</sub> was diluted into 100.0 mL with double-distilled water and brought to reflux while stirring. Subsequently, 4.0 mL of 1% trisodium citrate solution was added quickly, resulting in a color change from pale yellow to wine red. After that, the solution was refluxed for another 15 min.

***The Characterization of the Au@RuSiO<sub>2</sub> NPs***

---

\* Corresponding author. Tel.: +86-23-68252277; Fax: +86-23-68253172.

E-mail address: [yqchai@swu.edu.cn](mailto:yqchai@swu.edu.cn) (Y. Q. Chai)

Fig. S2A showed the UV-vis absorption spectra of Au NPs, Ru(phen)<sub>3</sub><sup>2+</sup>, RuSiO<sub>2</sub> NPs, Au@RuSiO<sub>2</sub> NPs, respectively. Obviously, the absorbance peak of Au NPs colloid was appeared at 520 nm (Fig. S2A (a)). Ru(phen)<sub>3</sub><sup>2+</sup> exhibited there characteristic peaks at 447 nm, 281 nm and 222 nm (Fig. S2A (b)). The synthesized RuSiO<sub>2</sub> NPs had similar peaks (Fig. S2A (c)), suggesting that many Ru(phen)<sub>3</sub><sup>2+</sup> molecules were doped into SiO<sub>2</sub> NPs successfully through the electrostatic interaction between Ru(phen)<sub>3</sub><sup>2+</sup> and silica nanoparticles. After that, Au NPs were assembled onto the RuSiO<sub>2</sub> NPs surfaces with the aid of BSA. The spectrum of Au@RuSiO<sub>2</sub> NPs shows the characteristic absorption peaks of Au NPs and RuSiO<sub>2</sub> NPs (Fig. S2A (d)), indicating the Au@RuSiO<sub>2</sub> NPs were prepared successfully.

In addition, scanning electron microscopy (SEM) was also used to characterize the synthesis of Au@RuSiO<sub>2</sub> NPs. As shown in Fig. S2B, the RuSiO<sub>2</sub> NPs were well-dispersed particles with a uniform diameter of ~150 nm, which were much larger than Au NPs, thus mangy Au NPs can load on RuSiO<sub>2</sub> NPs to form Au@RuSiO<sub>2</sub> NPs. Fig. S2C shown that the RuSiO<sub>2</sub> NPs were covered with a great deal of small spherical Au NPs, which demonstrated that the Au@RuSiO<sub>2</sub> NPs were prepared successfully.

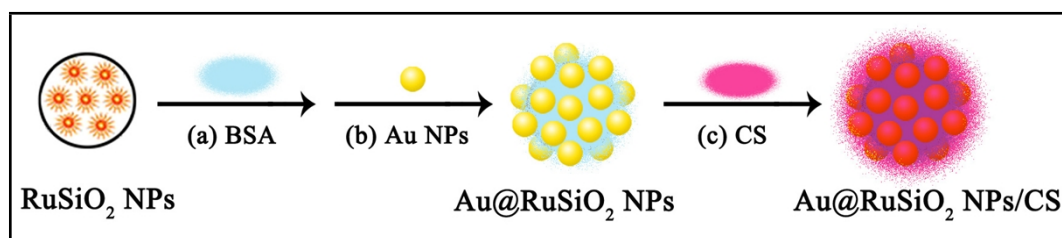

**Fig. S1** Preparation procedures of Au@RuSiO<sub>2</sub> NPs/CS.

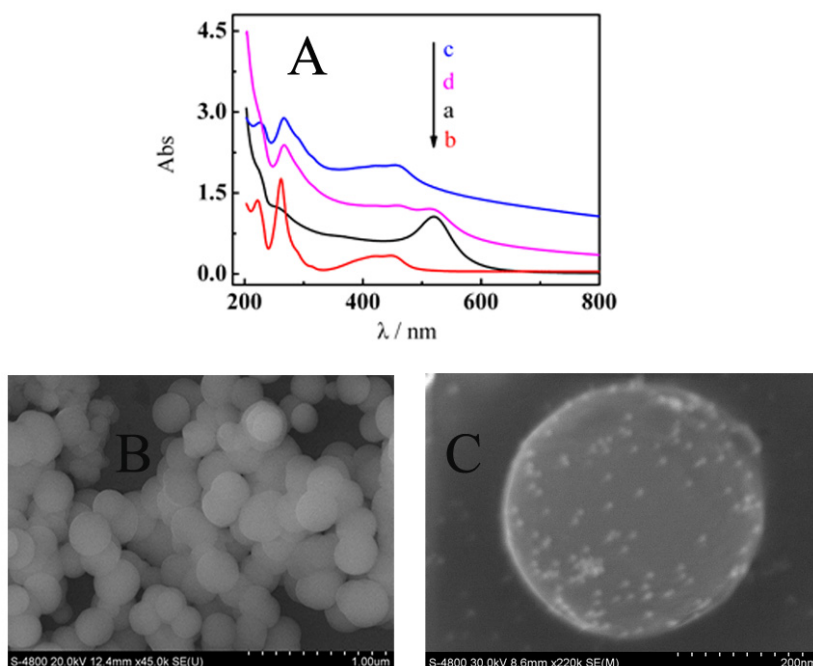

**Fig. S2** (A) UV-vis spectra of Au NPs (a, black),  $\text{Ru}(\text{phen})_3^{2+}$  (b, red),  $\text{RuSiO}_2$  NPs (c, blue),  $\text{Au}@RuSiO_2$  NPs (d, magenta), (B) SEM images of  $\text{RuSiO}_2$  NPs and (C) SEM images of  $\text{Au}@RuSiO_2$  NPs.

### ***CV Characterization of the immunosensor fabrication***

To gain a better understanding of the fabrication process, the cyclic voltammograms (CVs) experiments were also performed in 5 mM  $[\text{Fe}(\text{CN})_6]^{3-/4-}$  solution. As shown in Fig. S3, a pair of well-defined redox peak of  $[\text{Fe}(\text{CN})_6]^{3-/4-}$  was observed on the pretreated bare GCE (curve a). When  $\text{Au}@RuSiO_2$  NPs/CS complex were dropped onto the electrode, the current decreased clearly due to the insulating properties of CS (curve b). After the successive immobilization of  $\text{Ab}_1$ , BSA and cTnI, the peak current further decreased in order (curve c, d and e). That was because the formation of protein molecules layers hindered the electron transfer.

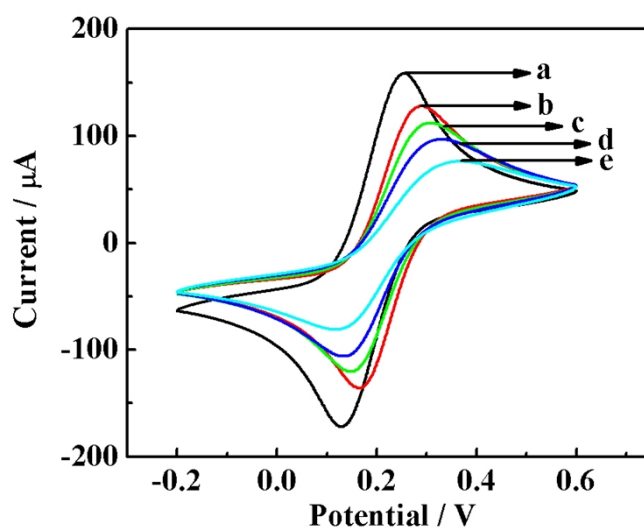

**Fig. S3** CV for (a) bare GCE, (b) Au@RuSiO<sub>2</sub> NPs/CS/GCE, (c) Ab<sub>1</sub>/Au@RuSiO<sub>2</sub> NPs/CS/GCE, (d) BSA/Ab<sub>1</sub>/Au@RuSiO<sub>2</sub> NPs/CS/GCE, (e) cTnI/BSA/Ab<sub>1</sub>/Au@RuSiO<sub>2</sub> NPs /CS/GCE, (f) Pt/Au NPs@GDH-PLH-Ab<sub>2</sub>/cTnI/BSA/Ab<sub>1</sub>/Au@RuSiO<sub>2</sub> NPs/CS/GCE, in 0.1 M KCl solution containing 5 mM [Fe(CN)<sub>6</sub>]<sup>3-/4-</sup>. Scan rate, 100 mV s<sup>-1</sup>.

### *Comparisons of proposed immunosensor with other detection methodologies for*

#### *cTnI detection*

**Table S1** Performance compared with other detection methodologies for cTnI detection.

| Detection method                    | Linear range/ng mL <sup>-1</sup> | Detection limit/pg mL <sup>-1</sup> | Ref.     |
|-------------------------------------|----------------------------------|-------------------------------------|----------|
| Surface Acoustic Wave               | 0.02 ~ 100                       | 20                                  | 2        |
| Surface Plasmon Resonance           | 0.03 ~ 6.5                       | 10                                  | 3        |
| Surface Plasmon Resonance           | 0.05 ~ 4.5                       | 50                                  | 4        |
| Localized Surface Plasmon Resonance | 1 ~ 20                           | 300                                 | 5        |
| Electrochemiluminescent             | 0.01 ~ 5                         | 4.5                                 | 6        |
| Electrochemiluminescent             | 0.01 ~ 10                        | 3.33                                | Our work |

From the Table S1 we can see that the proposed immunosensor has a relative large linear range and low detection limit compared with previous reports.

## Reference

- 1 G. Frens, *Nature*, 1973, **241**, 20.
- 2 J. Lee, Y.S. Choi, Y. Lee, H.J. Lee, J.N. Lee, S.K. Kim, K.Y. Han, E.C. Cho, J.C. Park and S.S. Lee, *Anal. Chem.*, 2011, **83**, 8629.
- 3 F. Dutra and L.T. Kubota, *Clin. Chim. Acta*, 2007, **376**, 114.
- 4 R.F. Dutra, R.K. Mendes, V. Lins da Silva and L.T. Kubota, *J. Pharm. Biomed. Anal.*, 2007, **43**, 1744.
- 5 L. Tang, J. Casas and M. Venkataramasubramani, *Anal. Chem.*, 2013, **85**, 1431.
- 6 H.L. Qi, X.Y. Qiu, D.P. Xie, C. Ling, Q. Gao and C.X. Zhang, *Anal. Chem.*, 2013, **85**, 3886.
